# Supplementary material for: Selective catalytic reduction of NO with NH3 over novel iron–tungsten mixed oxide catalyst in a broad temperature range
Source: Royal Society of Chemistry journal article supplement (doi:10.1039/c5cy00605h), 2015-01-01
Supplement: c5cy00605h1.pdf [file c5cy00605h1.pdf]

**Selective Catalytic Reduction of NO with NH<sub>3</sub> over Novel  
Iron–Tungsten Mixed Oxide Catalyst in a Broad  
Temperature Range**

Xiang Li, Junhua Li\*, Yue Peng, Tao Zhang, Shuai Liu and Jiming  
Hao

State Key Joint Laboratory of Environment Simulation and Pollution Control,  
School of Environment, Tsinghua University, Beijing, 100084, China

\* Corresponding authors: E-mail address: [lijunhua@tsinghua.edu.cn](mailto:lijunhua@tsinghua.edu.cn)

Tel.: +86 10 62771093, fax: +86 10 62771093

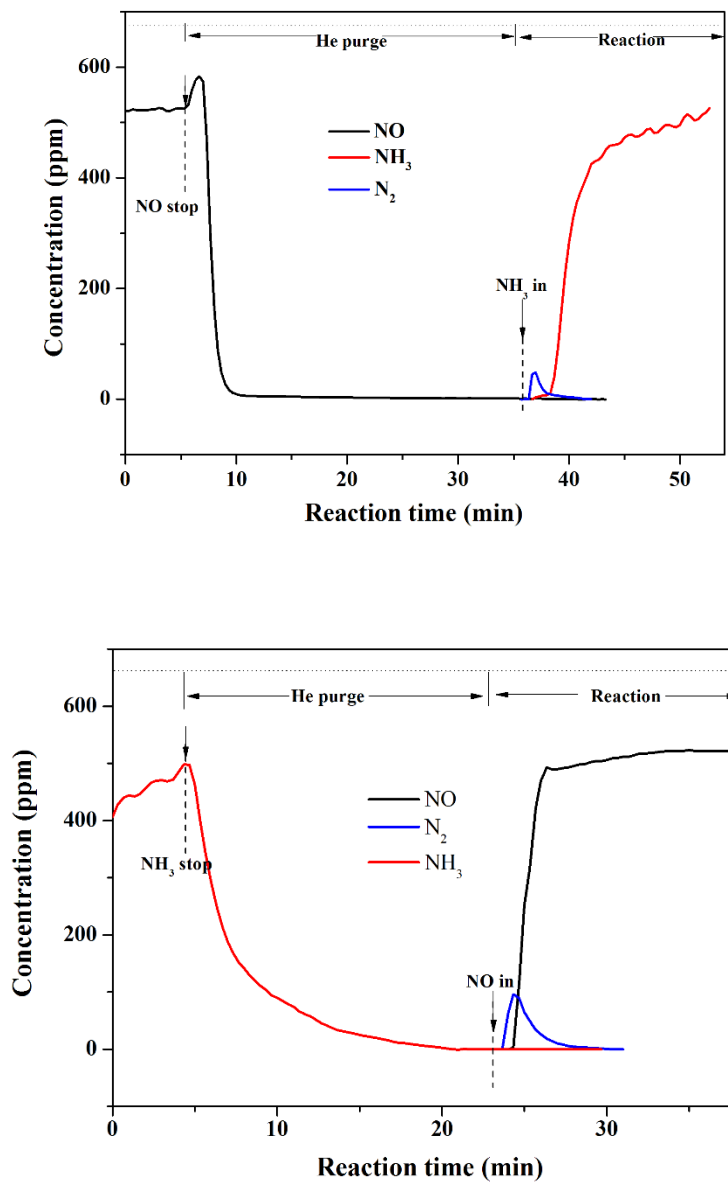

Fig. S1 Transient DRIFT experiments at 200°C

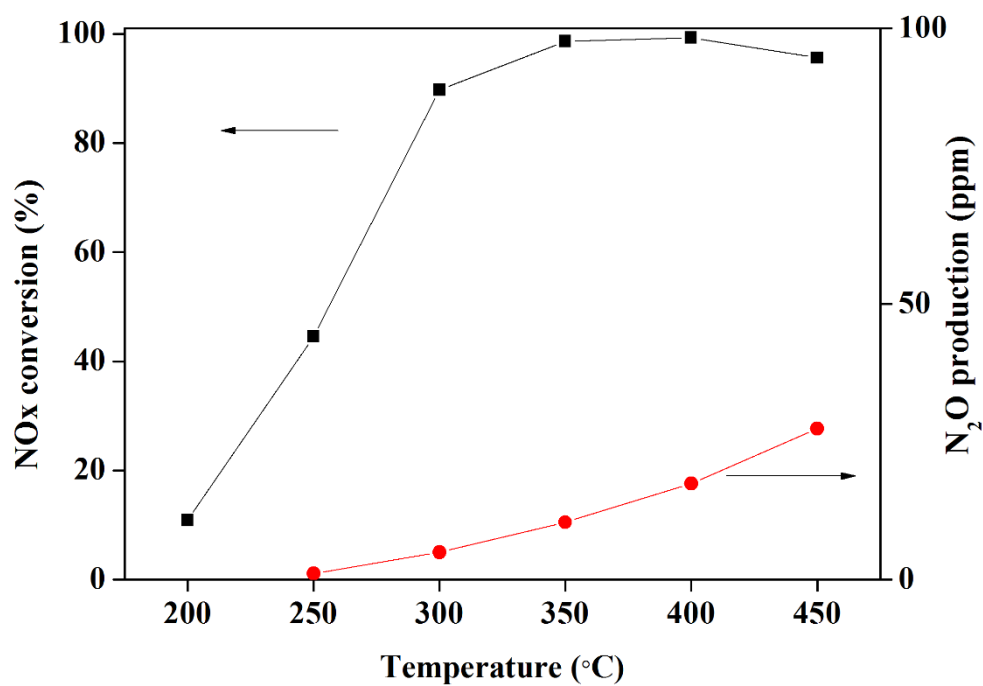

**Fig. S2.** NO<sub>x</sub> conversion and N<sub>2</sub>O production using FeW(5) catalyst

Reaction condition: [NO] = [NH<sub>3</sub>] = 500 ppm, [SO<sub>2</sub>] = 300 ppm and [O<sub>2</sub>] = 3%, total  
flow rate = 200 mL/min, GHSV = 60000 h<sup>-1</sup>

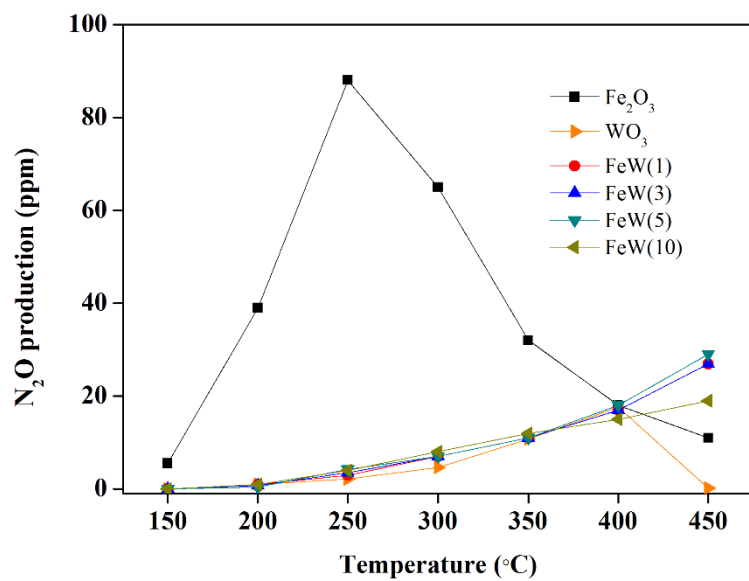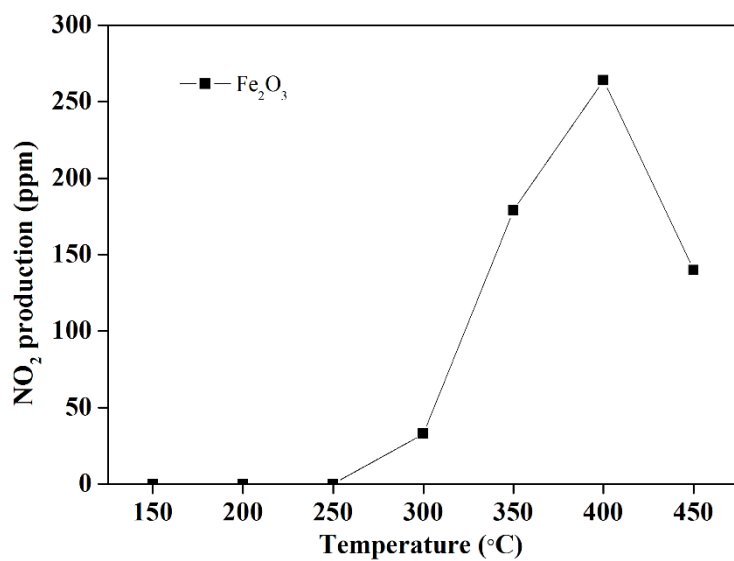

**Fig. S3.** N<sub>2</sub>O (upper) and NO<sub>2</sub> (down) production using FeW(x) catalyst  
 Reaction condition: [NO] = [NH<sub>3</sub>] = 500 ppm and [O<sub>2</sub>] = 3%, total flow rate= 200  
 mL/min, GHSV = 60000 h<sup>-1</sup>
